# Supplementary material for: Fabrication of highly fluorescent CdSe quantum dots via solvent-free microfluidic spinning microreactors
Source: Royal Society of Chemistry journal article supplement (doi:10.1039/c5ra21095j), 2015-01-01
Supplement: c5ra21095j1.pdf [file c5ra21095j1.pdf]

## Supporting Information

### Fabrication of highly fluorescent CdSe quantum dots via solvent-free microfluidic spinning microreactors

Wei Liu, Yan Zhang, Cai-Feng Wang\* and Su Chen\*

State Key Laboratory of Materials-Oriented Chemical Engineering College of Chemistry and Chemical Engineering, Nanjing Tech University, Nanjing 210009, People's Republic of China.

Email: [chensu@njtech.edu.cn](mailto:chensu@njtech.edu.cn)

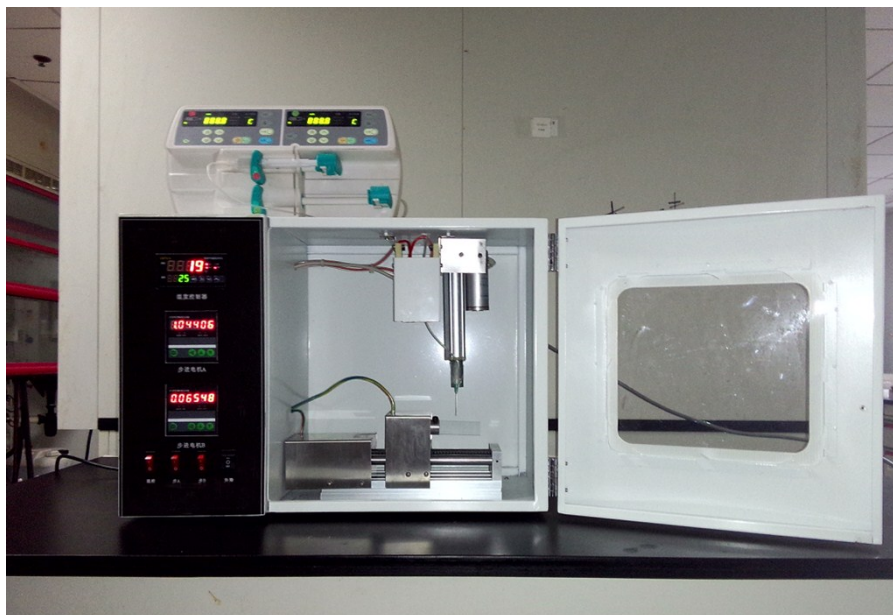

**Fig. S1** Panoramic image of experimental platform including microfluidic spinning machine, microfluidic pump, syringes, microchannel, 20G stainless steel needle.
